# Supplementary material
Source: PubMed Central journal article supplement (PMC7888718)
Supplement: joces-134-248393-s1.pdf [file joces-134-248393-s1.pdf]

## Table S1. Neurodevelopmental disorder-associated Trio variants.

[Click here to Download Table S1](#)

### References

- BARBOSA, S., GREVILLE-HEYGATE, S., BONNET, M., GODWIN, A., FAGOTTO-KAUFMANN, C., KAJAVA, A. V., LAOUTEOUET, D., MAWBY, R., AUNG WAI, H., BARALLE, D. and AL., E. 2020. Opposite Modulation of RAC1 by Mutations in TRIO is Associated with Distinct, Domain-Specific Neurodevelopmental Disorders. *Am. J. Hum. Genet*, 106, 338-55.
- KATRANCHA, S. M., WU, Y., ZHU, M., EIPPER, B. A., KOLESKE, A. J. and MAINS, R. E. 2017. Neurodevelopmental disease-associated de novo mutations and rare sequence variants affect TRIO GDP/GTP exchange factor activity. *Hum Mol Genet*, 26, 4728-4740.
- PENGELLY, R. J., GREVILLE-HEYGATE, S., SCHMIDT, S., SEABY, E. G., JABALAMELI, M. R., MEHTA, S. G., PARKER, M. J., GOUDIE, D., FAGOTTO-KAUFMANN, C., BARALLE, D. and AL., E. 2016. Mutations specific to the Rac-GEF domain of TRIO cause intellectual disability and microcephaly. *J. Med Genet*, 53, 735-42.
- SADYBEKOV, A., TIAN, C., ARNESANO, C., KATRITCH, V. and HERRING, B. E. 2017. An autism spectrum disorder-related de novo mutation hotspot discovered in the GEF1 domain of Trio. *Nat Commun*, 8, 601.
- SINGH, T., POTERBA, T., CURTIS, D., AKIL, H., AL EISSA, M., BARCHAS, J. D., BASS, N., BIGDELI, T. B., BREEN, G., DALY, M. J. and AL., E. 2020. Exome sequencing identifies rare coding variants in 10 genes which confer substantial risk for schizophrenia. *medRxiv*, 2020.09.18.20192815.
